# Supplementary material
Source: PubMed Central journal article supplement (PMC8803034)
Supplement: boe-13-1-358-s001.pdf [file boe-13-1-358-s001.pdf]

## Refractive-index matching enhanced polarization sensitive optical coherence tomography quantification in human brain tissue: supplement

CHAO J. LIU,<sup>1,6</sup>  WILLIAM AMMON,<sup>1</sup> ROBERT J. JONES,<sup>1</sup>  
JACKSON NOLAN,<sup>1</sup> RUOPENG WANG,<sup>1</sup> SHUAIBIN CHANG,<sup>2</sup>   
MATTHEW P. FROSCH,<sup>3</sup> ANASTASIA YENDIKI,<sup>1</sup> DAVID A. BOAS,<sup>4</sup>  
CAROLINE MAGNAIN,<sup>1</sup> BRUCE FISCHL,<sup>1,5</sup> AND HUI WANG<sup>1,7</sup>

<sup>1</sup>Athinoula A. Martinos Center for Biomedical Imaging, Department of Radiology, Massachusetts General Hospital/Harvard Medical School, Charlestown, MA 02129, USA

<sup>2</sup>Department of Electrical and Computer Engineering, Boston University, Boston, MA 02215, USA

<sup>3</sup>C.S. Kubik Laboratory for Neuropathology, Massachusetts General Hospital/Harvard Medical School, Boston, MA 02114, USA

<sup>4</sup>Department of Biomedical Engineering, Boston University, Boston, MA 02215, USA

<sup>5</sup>MIT HST, Computer Science and AI Lab, Cambridge, MA 02139, USA

<sup>6</sup>[cliu53@mgh.harvard.edu](mailto:cliu53@mgh.harvard.edu)

<sup>7</sup>[hwang47@mgh.harvard.edu](mailto:hwang47@mgh.harvard.edu)

---

This supplement published with Optica Publishing Group on 15 December 2021 by The Authors under the terms of the [Creative Commons Attribution 4.0 License](https://creativecommons.org/licenses/by/4.0/) in the format provided by the authors and unedited. Further distribution of this work must maintain attribution to the author(s) and the published article's title, journal citation, and DOI.

Supplement DOI: <https://doi.org/10.6084/m9.figshare.17086814>

Parent Article DOI: <https://doi.org/10.1364/BOE.443066>

Supplemental Document

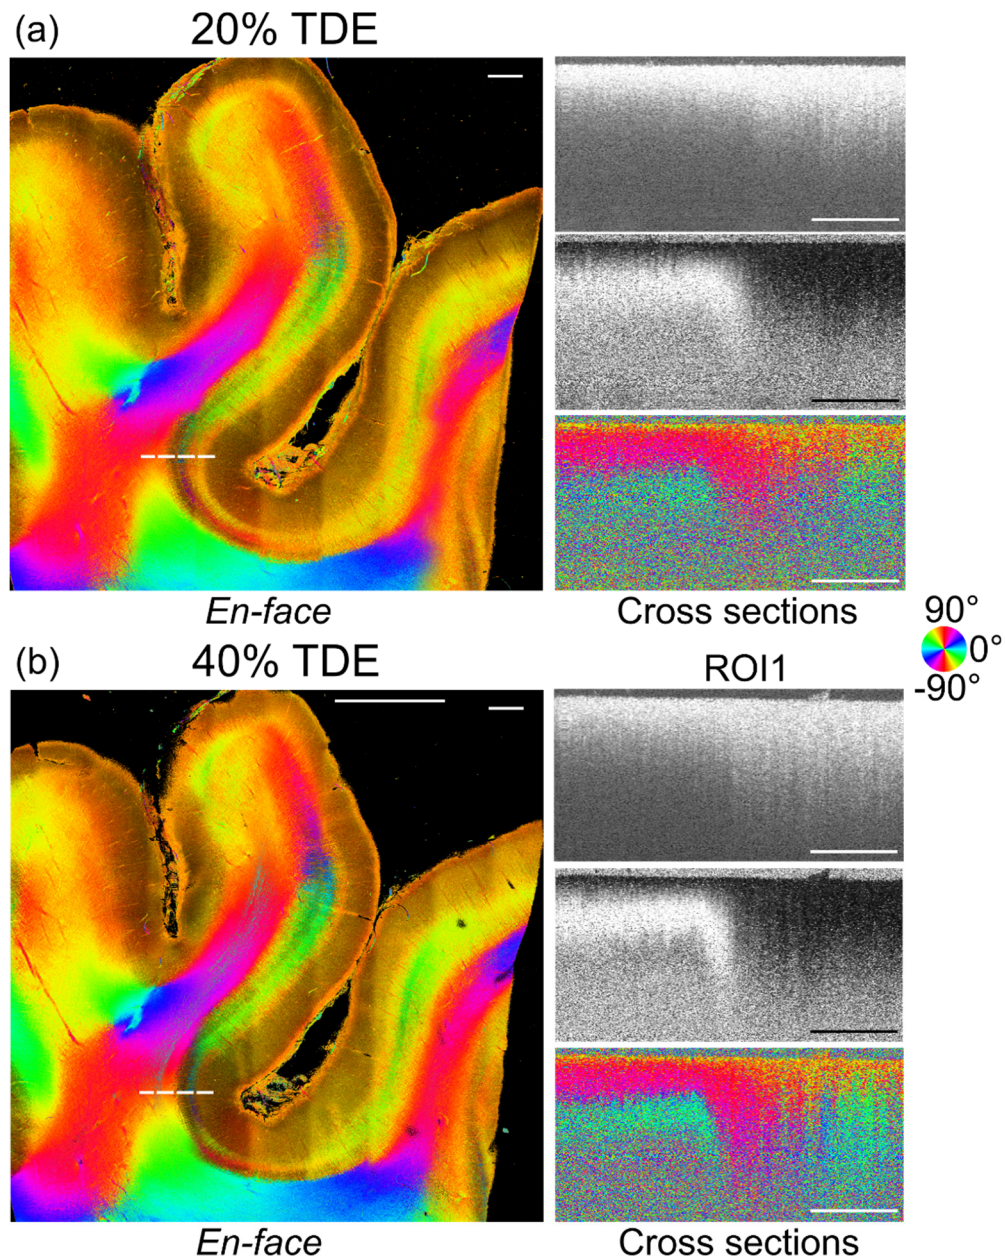

Fig. S1 PS-OCT images of human visual cortex in the occipital lobe *ex vivo* with 20% (a) and 40% TDE immersion (b), corresponding to Fig. 1. *En-face* optic axis orientation images by integrating 500  $\mu\text{m}$  in depth are shown on the left and cross-sectional images are shown on the right. The location of the cross-sectional images of intensity (35~75 dB), retardance (0~60 deg) and optic axis orientation (-90~90 deg) were indicated by the dashed line on the *en-face* orientation in (a) and (b), separately. For *en-face* orientation images, axis orientation values are color coded in HSV space as illustrated by the color wheel and the brightness is modulated by retardance. Scale bars: 1 mm.

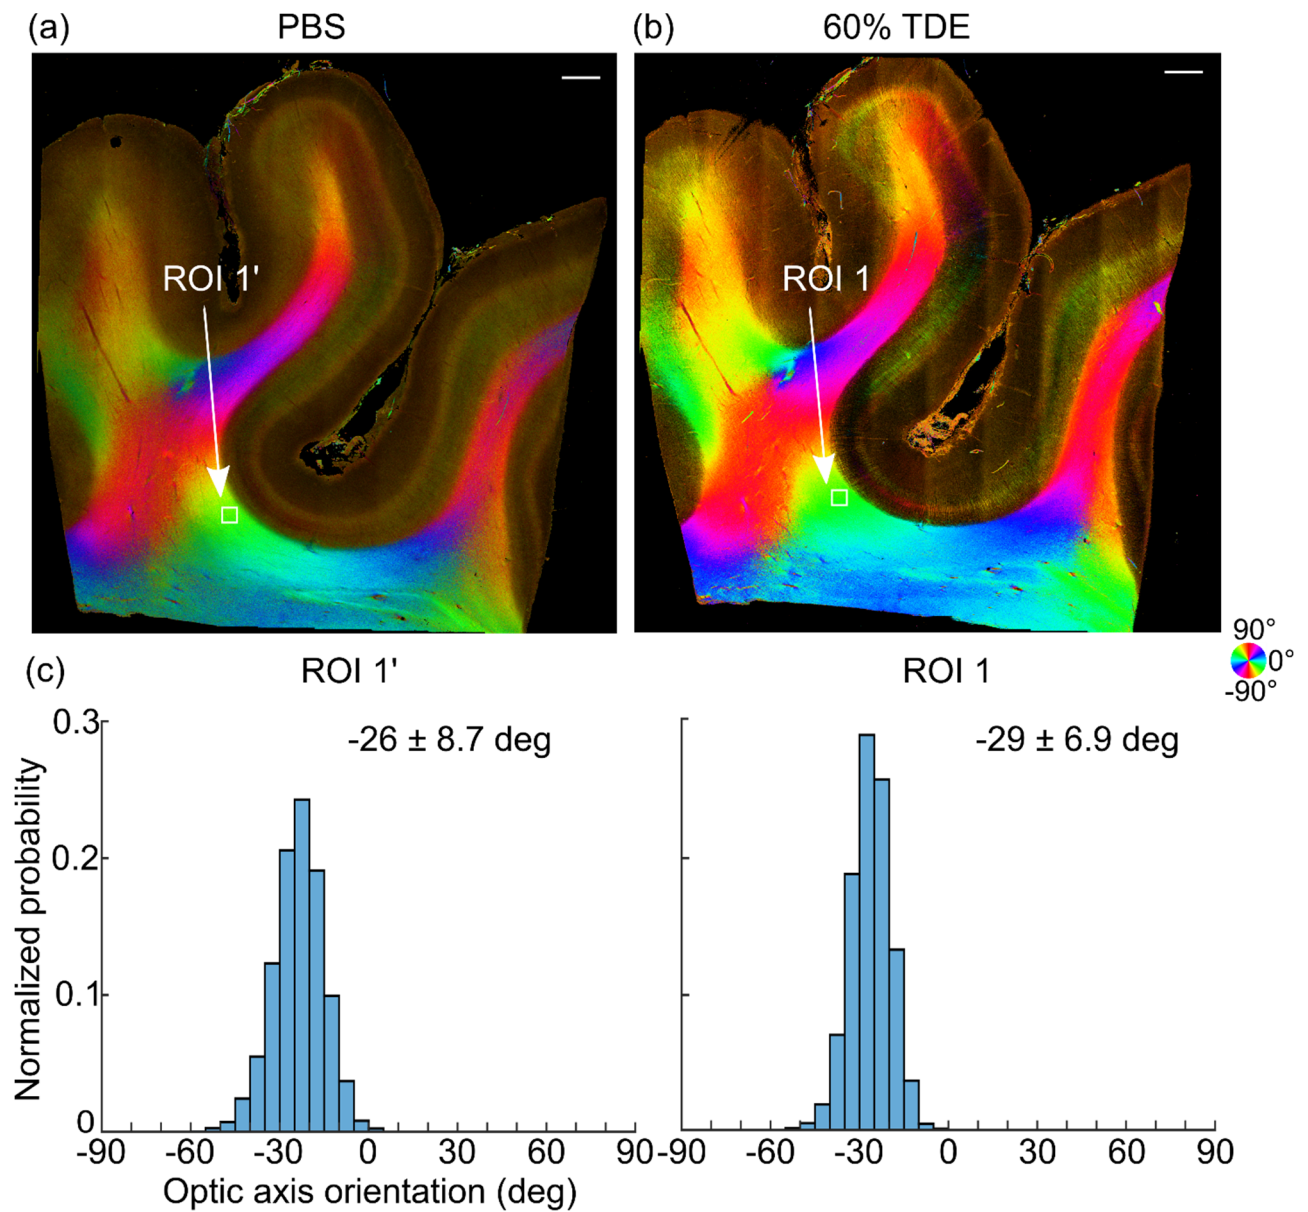

Fig. S2 *En-face* orientation images integrating 200  $\mu\text{m}$  in depth with PBS (a) and 60% TDE immersion (b), corresponding to Fig. 1.

(a) - (b) The axis orientation values are color coded in HSV space as illustrated by the color wheel and the brightness is modulated by retardance. Scale bars: 1 mm.

(c) The orientation distributions in the same  $500 \times 500 \mu\text{m}^2$  region labeled as ROI1' and ROI1 in (a) and (b), respectively. The averaged orientations are  $-26 \pm 8.7$  deg and  $-29 \pm 6.9$  deg with PBS and 60% TDE immersion.

Table S1. Apparent birefringence  $\Delta n$  measurements (mean $\pm$ S.D.) in the white matter with respect to TDE concentration at three depth intervals.

| TDE concentration | 0 – 200 $\mu\text{m}$              | 200 – 400 $\mu\text{m}$            | 400 – 600 $\mu\text{m}$            |
|-------------------|------------------------------------|------------------------------------|------------------------------------|
| 0%                | 0.15 $\pm$ 0.06 deg/ $\mu\text{m}$ | 0.04 $\pm$ 0.03 deg/ $\mu\text{m}$ | 0.04 $\pm$ 0.02 deg/ $\mu\text{m}$ |
| 20%               | 0.2 $\pm$ 0.07 deg/ $\mu\text{m}$  | 0.06 $\pm$ 0.04 deg/ $\mu\text{m}$ | 0.04 $\pm$ 0.03 deg/ $\mu\text{m}$ |
| 40%               | 0.25 $\pm$ 0.06 deg/ $\mu\text{m}$ | 0.13 $\pm$ 0.06 deg/ $\mu\text{m}$ | 0.04 $\pm$ 0.03 deg/ $\mu\text{m}$ |
| 60%               | 0.27 $\pm$ 0.09 deg/ $\mu\text{m}$ | 0.18 $\pm$ 0.08 deg/ $\mu\text{m}$ | 0.09 $\pm$ 0.06 deg/ $\mu\text{m}$ |

Table S2. Apparent birefringence  $\Delta n$  measurements (mean $\pm$ S.D.) in the gray matter with respect to TDE concentration at three depth intervals.

| TDE concentration | 0 – 200 $\mu\text{m}$               | 200 – 400 $\mu\text{m}$            | 400 – 600 $\mu\text{m}$            |
|-------------------|-------------------------------------|------------------------------------|------------------------------------|
| 0%                | 0.023 $\pm$ 0.02 deg/ $\mu\text{m}$ | 0.08 $\pm$ 0.04 deg/ $\mu\text{m}$ | 0.04 $\pm$ 0.03 deg/ $\mu\text{m}$ |
| 20%               | 0.018 $\pm$ 0.01 deg/ $\mu\text{m}$ | 0.05 $\pm$ 0.03 deg/ $\mu\text{m}$ | 0.06 $\pm$ 0.03 deg/ $\mu\text{m}$ |
| 40%               | 0.019 $\pm$ 0.02 deg/ $\mu\text{m}$ | 0.04 $\pm$ 0.03 deg/ $\mu\text{m}$ | 0.06 $\pm$ 0.03 deg/ $\mu\text{m}$ |
| 60%               | 0.019 $\pm$ 0.02 deg/ $\mu\text{m}$ | 0.02 $\pm$ 0.02 deg/ $\mu\text{m}$ | 0.03 $\pm$ 0.02 deg/ $\mu\text{m}$ |

Table S3.  $Var_{\theta}$  measurements (mean $\pm$ S.D.) in the white matter with respect to TDE concentration at three depth intervals.

| TDE concentration | 0 – 200 $\mu\text{m}$ | 200 – 400 $\mu\text{m}$ | 400 – 600 $\mu\text{m}$ |
|-------------------|-----------------------|-------------------------|-------------------------|
| 0%                | 26 $\pm$ 8 deg        | 58 $\pm$ 15 deg         | 59 $\pm$ 7 deg          |
| 20%               | 18 $\pm$ 5 deg        | 52 $\pm$ 18 deg         | 53 $\pm$ 9 deg          |
| 40%               | 16 $\pm$ 4 deg        | 38 $\pm$ 15 deg         | 54 $\pm$ 11 deg         |
| 60%               | 17 $\pm$ 5 deg        | 25 $\pm$ 13 deg         | 44 $\pm$ 19 deg         |

Table S4.  $Var_{\theta}$  measurements (mean $\pm$ S.D.) in the gray matter with respect to TDE concentration at three depth intervals.

| TDE concentration | 0 – 200 $\mu$ m | 200 – 400 $\mu$ m | 400 – 600 $\mu$ m |
|-------------------|-----------------|-------------------|-------------------|
| 0%                | 36 $\pm$ 13 deg | 65 $\pm$ 12 deg   | 61 $\pm$ 8 deg    |
| 20%               | 27 $\pm$ 10 deg | 52 $\pm$ 21 deg   | 60 $\pm$ 12 deg   |
| 40%               | 30 $\pm$ 15 deg | 49 $\pm$ 20 deg   | 51 $\pm$ 16 deg   |
| 60%               | 32 $\pm$ 15 deg | 40 $\pm$ 21 deg   | 40 $\pm$ 21 deg   |
